# Supplementary material for: Equilibrium Dynamics of β-N-Methylamino-L-Alanine (BMAA) and Its Carbamate Adducts at Physiological Conditions
Source: PubMed Central journal article supplement (PMC4981398; doi:10.1371/journal.pone.0160491), 2016-08-11
Supplement: pone.0160491.s002.pdf [file pone.0160491.s002.pdf]

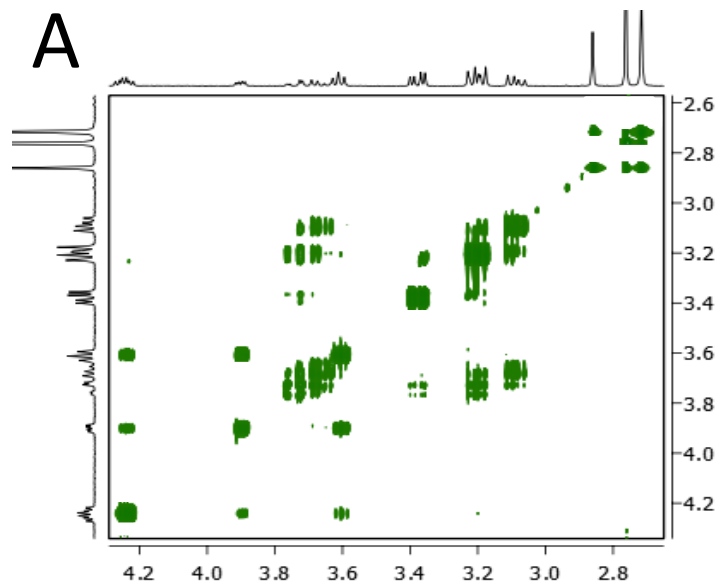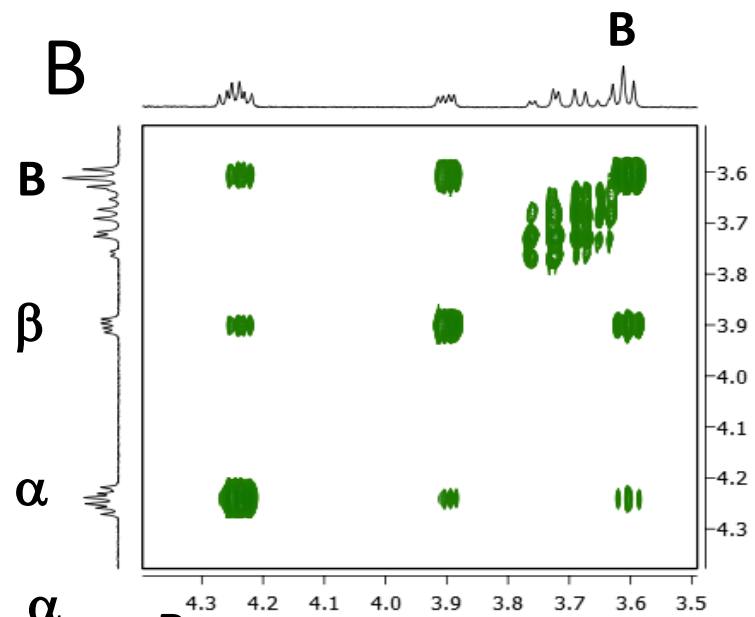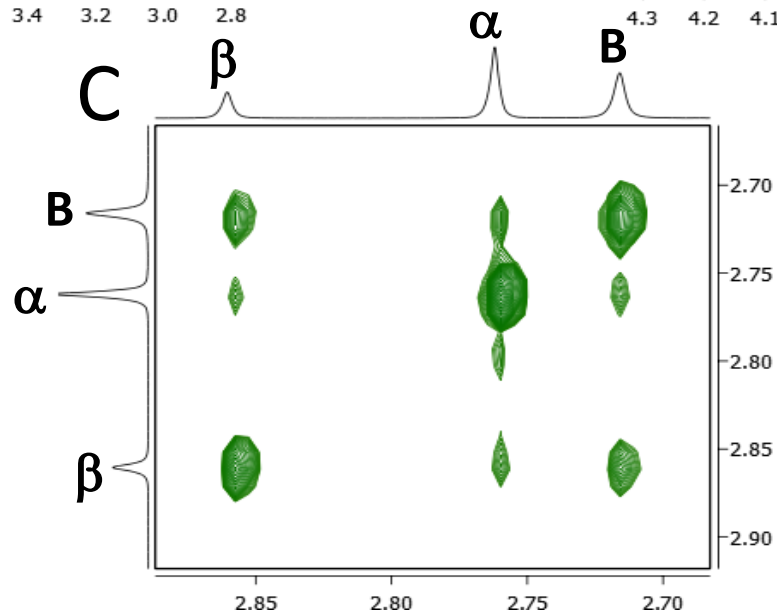

S2 Fig
