# Supplementary material for: Equilibrium Dynamics of β-N-Methylamino-L-Alanine (BMAA) and Its Carbamate Adducts at Physiological Conditions
Source: PubMed Central journal article supplement (PMC4981398; doi:10.1371/journal.pone.0160491), 2016-08-11
Supplement: pone.0160491.s003.pdf [file pone.0160491.s003.pdf]

pH 7.6

Peak Intensities from 1D NMR spectrum (AU)

S1 Table

| Sample Conditions |                    |      | Free-BMAA (B) |      |   | Primary - Carbamate (P) |   |      | Secondary - Carbamate (S) |      |   |
|-------------------|--------------------|------|---------------|------|---|-------------------------|---|------|---------------------------|------|---|
| BMAA              | NaHCO <sub>3</sub> | Temp | Me            | α    | β | Me                      | α | β    | Me                        | α    | β |
| 5mM               | 100mM              | 25C  | 5.62          | 2.13 |   | 2.38                    | 1 | 1.04 | 1.18                      | 0.54 |   |

Peak Volumes from EXSY Experiment

| Peaks | B    | P     | S     |
|-------|------|-------|-------|
| B     | 39.5 | 2.22  | 6.57  |
| P     | 2.17 | 55.73 | 0.99  |
| S     | 6.93 | 0.98  | 16.86 |

| Populations | B    | P    | S    |
|-------------|------|------|------|
| B           | 5.62 | 2.38 | 1.18 |
| P           | 5.62 | 2.38 | 1.18 |
| S           | 5.62 | 2.38 | 1.18 |

| A-matrix | B    | P     | S     |
|----------|------|-------|-------|
| B        | 7.03 | 0.93  | 5.57  |
| P        | 0.39 | 23.42 | 0.84  |
| S        | 1.23 | 0.41  | 14.29 |

| R-marix | B     | P     | S     |
|---------|-------|-------|-------|
| B       | -3.81 | -0.13 | -1.11 |
| P       | -0.05 | -6.30 | -0.08 |
| S       | -0.25 | -0.04 | -5.26 |

Eqs. 9, 10 & 11

$$\text{Eq. 12 } \tilde{A} = \begin{pmatrix} \frac{V_{[BMAA]_r-[BMAA]_f}}{P_{[BMAA]_r}} & \frac{V_{[BMAA]_r-[α-Carbamate]}}{P_{[α-Carbamate]}} & \frac{V_{[BMAA]_r-[β-Carbamate]}}{P_{[β-Carbamate]}} \\ \frac{V_{[α-Carbamate]_[BMAA]_f}}{P_{[BMAA]_r}} & \frac{V_{[α-Carbamate]_[α-Carbamate]}}{P_{[α-Carbamate]}} & \frac{V_{[α-Carbamate]_[β-Carbamate]}}{P_{[β-Carbamate]}} \\ \frac{V_{[β-Carbamate]_[BMAA]_f}}{P_{[BMAA]_r}} & \frac{V_{[β-Carbamate]_[α-Carbamate]}}{P_{[α-Carbamate]}} & \frac{V_{[β-Carbamate]_[β-Carbamate]}}{P_{[β-Carbamate]}} \end{pmatrix}$$

$$\tilde{R} = \begin{pmatrix} R_{BMAA} + k_{1α}^{**} + k_{1β}^{**} & -k_{2α}^{*} & -k_{2β}^{*} \\ -k_{1α}^{**} & R_α + k_{2α}^{*} & -k_{2αβ}^{*} \\ -k_{1β}^{**} & -k_{1βα}^{*} & R_β + k_{2β}^{*} \end{pmatrix}$$

|                                                                   | s <sup>-1</sup> | Expt. Parameters | units            |
|-------------------------------------------------------------------|-----------------|------------------|------------------|
| R + k <sub>1P</sub> <sup>**</sup> + k <sub>1S</sub> <sup>**</sup> | -3.81           | BMAA 5mM         | 0.005 M          |
| k <sub>2P</sub> <sup>*</sup>                                      | -0.13           | Na-BC 100mM      | 0.1 M            |
| k <sub>2S</sub> <sup>*</sup>                                      | -1.11           | pH               | 7.6              |
| k <sub>1P</sub> <sup>**</sup>                                     | -0.05           | Temp             | 298 K            |
| R + k <sub>2P</sub> <sup>*</sup>                                  | -6.30           | R                | 8.314462 J/mol.K |
| k <sub>2PS</sub> <sup>**</sup>                                    | -0.08           | pKa (amine)      | 8.4              |
| k <sub>1S</sub> <sup>**</sup>                                     | -0.25           | pKa (cabonic)    | 4.8              |
| k <sub>1SP</sub> <sup>**</sup>                                    | -0.04           |                  |                  |
| R + k <sub>2S</sub> <sup>*</sup>                                  | -5.26           |                  |                  |

$$\tilde{R} = -\frac{\ln \tilde{A}}{\tau_m} = X(\ln \Lambda) X^{-1} = \begin{pmatrix} R_B + k_{1P}^{**} + k_{1S}^{**} & -k_{2P}^{*} & -k_{2S}^{*} \\ -k_{1P}^{**} & R_P + k_{2P}^{*} & -k_{2PS}^{*} \\ -k_{1S}^{**} & -k_{1SP}^{*} & R_S + k_{2S}^{*} \end{pmatrix}$$

$$k_{1P}^{**} = \frac{k_{1P}^{*}}{[CO_2]}$$

$$k_{1P}^{*} = k_{1P}^{**} \frac{[BMAA][CO_2]}{[BMAA][CO_2]} = k_{1P}^{**} \frac{1}{8.4} \frac{1}{4.8}$$

$$k_{2P}^{*} = \frac{k_{2P}^{*}}{[H^+]}$$

$$K_P^* = K_P^* = \frac{k_{1P}^{*}}{k_{2P}^{*}} = \frac{[carbamate]}{[BMAA][CO_2]}$$

$$\Delta G^{\circ} = -RT \ln(K^*)$$

|      | Primary  | Secondary                                  |
|------|----------|--------------------------------------------|
| k1** | 0.05     | 0.25 s <sup>-1</sup>                       |
| k1*  | 0.52     | 2.46 M <sup>-1</sup> s <sup>-1</sup>       |
| k1   | 1.30E-02 | 6.10E-02 M <sup>-1</sup> s <sup>-1</sup>   |
| k2*  | 0.13     | 1.11 s <sup>-1</sup>                       |
| k2   | 3.20E-09 | 2.79E-08 M <sup>-1</sup> s <sup>-1</sup>   |
| K*   | 4.10     | 2.22 M <sup>-1</sup>                       |
| ΔG   | -3.50    | -1.97 kJ mol <sup>-1</sup> K <sup>-1</sup> |

```

#
# Matrix routines for eigenvalue calculations
#library(Matrix);

# See the excel sheet for details
#
#
# Using data for BMAA, 1:10 with BMAA 5mM Me region, 30C, pD 7.6
#
# data_lto10 <- matrix(c(23.07020834, 2.795496968, 14.35471317,
# 2.077091231, 35.94973474, 1.378394458,
# 4.599084219, 0.8041536, 17.62579491),
# nrow = 3, ncol = 3, byrow = TRUE);

data_lto10 <- matrix(c(22.55910717, 2.875305631, 14.32710313,
2.031075012, 36.97606397, 1.375743237,
4.497195353, 0.827111387, 17.59189324),
nrow = 3, ncol = 3, byrow = TRUE);

amat <- data_lto10;
#
mix = 400e-3;
A <- amat; A
X <- eigen(A)$vectors; X # eigen matrix
Xinv <- solve(X); Xinv # inverse eigen matrix
D <- Xinv %*% A %*% X; D # Diagonalized
#D <- diag(eigen(A)$values);
logD <- diag(log(eigen(A)$values)); logD
R <- X %*% logD %*% Xinv; R # Relax matrix
R <- -1*R/mix; R;
write.csv(R, file = "dataalto10.csv");

mdat <- D;
Remat <- eigen(mdat, symmetric = FALSE);

# Check if it is diagonalized
m <- mdat;
p <- eigen(m)$vectors
d <- diag(eigen(m)$values)
p %*% d %*% solve(p);

amat <- data_lto20;
#
mix = 400e-3;
A <- amat; A
X <- eigen(A)$vectors; X # eigen matrix
Xinv <- solve(X); Xinv # inverse eigen matrix
D <- Xinv %*% A %*% X; D # Diagonalized
#D <- diag(eigen(A)$values);
logD <- diag(log(eigen(A)$values)); logD
R <- X %*% logD %*% Xinv; R # Relax matrix
R <- -1*R/mix; R;
write.csv(R, file = "dataalto20.csv");

```
